# Supplementary material for: Non-target and suspect characterisation of organic contaminants in Arctic air, Part II: Application of a new tool for identification and prioritisation of chemicals of emerging Arctic concern in air
Source: Copernicus journal article supplement (doi:10.5194/acp-2020-105), 2020-02-13
Supplement: Supplementary file 1 [file Excel-SI acp-2020-105.xlsx]

## Sheet: Arctic air
Compound	Level	1D RT (s)	2D RT (s)	Sample	CAS	INCHIKEYs	SMILES out of Jchem	Quant S/N	Quant Mass	Similarity	Reverse	Probability	Formula	Area	Weight	other comments	Found in air samples from Birkenes	logP Jchem	logD pH7 Jchem	Standard half-life [days] (25 °C; 1.5E6 mol cm-3) EPIsuite	Adjusted half-life [days] (-2.4 °C; 6.0E3 mol cm-3)	BCF	log Kow	log KoA	log Kaw	Toxcisity	HPV List	APOWIN Atm. Ox half-life [days]	t1/2 fresh water [h]	t1/2 soil [h]	t1/2 sediment [h]
Legacy POPs and PAHs
a-HCH	1	2032.5	1.76	PUF	319-84-6	JLYXXMFPNIAWKQ-SHFUYGGZSA-N	ClC1C(Cl)C(Cl)C(Cl)C(Cl)C1Cl	6145.3	183	887	936	8487	C6H6Cl6	652236	288		PUF	4.34554	4.34554	18.659	3508.5	250.4	4.14	7.817	-3.677	possibly carcinogenic to humans	SPIN	18.659	4320	8640	38900
g-HCH	1	2172	1.72	PUF	58-89-9	JLYXXMFPNIAWKQ-GNIYUCBRSA-N	ClC1C(Cl)C(Cl)C(Cl)C(Cl)C1Cl	480.09	165	736	783	5402	C6H6Cl6	177716	288		PUF	4.34554	4.34554	18.659	3508.5	250.4	4.14	7.817	-3.677	STOT Rep. Exp. 2, acute&chronic aq. 1	EU(07), OECD HPV, SPIN	18.659	4320	8640	38900
HCB	0	1969.5	1.94	GFF+PUF	118-74-1	CKAPSXZOOQJIBF-UHFFFAOYSA-N	ClC1=C(Cl)C(Cl)=C(Cl)C(Cl)=C1Cl	83139	284	742	745	9691	C6Cl6	8032459	282		PUF	5.59751	5.59751	633.112	119079	2803	5.73	7.355	-1.625			633.112	4320	8640	38900
Benzene, pentachloro-	2	1627.5	1.9	PUF	608-93-5	CEOCDNVZRAIOQZ-UHFFFAOYSA-N	ClC1=CC(Cl)=C(Cl)C(Cl)=C1Cl	8912.2	250	896	901	9854	C6HCl5	890178	248	no std analysed		4.99347	4.99347	184.851	34736.6	1216	5.18	6.722	-1.542			184.851	4320	8640	38900
o,p'-DDT	1	2883	1.82	PUF	789-02-6	CVUGPAFCQJIYDT-UHFFFAOYSA-N	ClC1=CC=C(C=C1)C(C1=CC=CC=C1Cl)C(Cl)(Cl)Cl	435.52	235	667	718	3105	C14H9Cl5	46717	352			6.4575	6.4575	3.114	585.508	4130	6.79	10.309	-3.519		.	3.114	4320	8640	38900
p,p'-DDT	0	2977.5	1.82	GFF+PUF	104215-84-1	YVGGHNCTFXOJCH-WCGVKTIYSA-N	ClC1=CC=C(C=C1)C(C1=CC=C(Cl)C=C1)C(Cl)(Cl)Cl	184.57	235	883	890	8932	C14H9Cl5	18833	364		GFF+PUF	6.4575	6.4575	3.114	585.508	16840	6.91	10.378	-3.468			3.114	4320	8640	38900
p,p'-DDE	1	2725.5	1.82	PUF	72-55-9	UCNVFOCBFJOQAL-UHFFFAOYSA-N	ClC(Cl)=C(C1=CC=C(Cl)C=C1)C1=CC=C(Cl)C=C1	3470.7	246	851	877	6193	C14H8Cl4	297588	316		PUF	6.10556	6.10556	1.44	270.689	9168	6.51	9.279	-2.769		.	1.44	4320	8640	38900
PCB 153	0	2860.5	1.89	GFF+PUF	35065-27-1	MVWHGTYKUMDIHL-UHFFFAOYSA-N	ClC1=CC(Cl)=C(C=C1Cl)C1=CC(Cl)=C(Cl)C=C1Cl	315.39	360	851	851	9562	C12H4Cl6	15154	370		PUF	7.24474	7.24474	65.216	12263.7	22000	7.75	10.777	-3.027			65.216	4320	8640	38900
Dieldrin	1	2739	1.91	PUF	60-57-1	DFBKLUNHFCTMDC-PICURKEMSA-N	ClC1=C(Cl)C2(Cl)C3C4CC(C5OC45)C3C1(Cl)C2(Cl)Cl	434.57	263	830	835	9434	C12H8Cl6O	33701	378		PUF	3.94718	3.94718	1.163	218.595	1253	5.2	8.588	-3.388	STOT Rep. Exp. 1, Repr. 1B, acute tox 1 inhalation&oral, acute&chronic aq. 1	SPIN	1.163	4320	8640	38900
Dieldrin	1	2739	1.92	GFF	60-57-1	DFBKLUNHFCTMDC-PICURKEMSA-N	ClC1=C(Cl)C2(Cl)C3C4CC(C5OC45)C3C1(Cl)C2(Cl)Cl	76.873	263	439	492	8897	C12H8Cl6O	4041.9	378		PUF	3.94718	3.94718	1.163	218.595	1253	5.2	8.588	-3.388	STOT Rep. Exp. 1, Repr. 1B, acute tox 1 inhalation&oral, acute&chronic aq. 1	SPIN	1.163	4320	8640	38900
trans-Nonachlor	1	2586	2.04	PUF	39765-80-5	OCHOKXCPKDPNQU-DFACZZRHSA-N	ClC1C(Cl)C2C(C1Cl)C1(Cl)C(Cl)=C(Cl)C2(Cl)C1(Cl)Cl	926.13	409	665	682	5053	C10H5Cl9	36907	440		PUF	5.59124	5.59124	2.197	504.75	7190	6.35	9.344	-2.994		.	2.197	4320	8640	38900
Cis-Chlordane	1	2631	1.94	PUF	5103-71-9	BIWJNBZANLAXMG-KMMBHOGFSA-N	ClC1CC2C(C1Cl)C1(Cl)C(Cl)=C(Cl)C2(Cl)C1(Cl)Cl	958.7	373	774	797	7824	C10H6Cl8	36143	406			5.26999	5.26999	2.123	399.176	5901	6.22	8.922	-2.702		.	2.123	4320	8640	38900
BDE 28	0	2923.5	1.74	GFF+PUF	41318-75-6	UPNBETHEXPIWQX-UHFFFAOYSA-N	BrC1=CC=C(OC2=C(Br)C=C(Br)C=C2)C=C1	12.085	406	828	880	9815	C12H7Br3O	608.28	416			5.77979	5.77979	7.57	1423.44	3519	5.88	9.396	-3.516			7.57	1440	2880	13000
BDE 47	0	3270	1.78	GFF+PUF	5436-43-1	XYBSIYMGXVUVGY-UHFFFAOYSA-N	BrC1=CC=C(OC2=CC=C(Br)C=C2Br)C(Br)=C1	186.43	326	669	805	9661	C12H6Br4O	9771.5	494			6.54854	6.54854	10.661	2004.63	13600	6.77	10.686	-3.916			10.661	4320	8640	38900
Heptachlor exo epoxide	1	2536.5	1.91	PUF	1024-57-3	ZXFXBSWRVIQKOD-HWKPLSEASA-N	ClC1C2OC2C2C1C1(Cl)C(Cl)=C(Cl)C2(Cl)C1(Cl)Cl	729.34	353	575	586	9868	C10H5Cl7O	25868	386		PUF	4.04376	4.04376	2.067	388.69	897	4.98	8.046	-3.066	STOT Rep. Exp. 2, Carc. 2, acute&chronic aq. 1	.	2.067	4320	8640	38900
Benzo[ghi]fluoranthene	1	3180	1.77	PUF	203-12-3	YEIHPPOCKIHUQJ-UHFFFAOYSA-N	C1=CC2=CC=C3C=CC4=CC=CC5=C4C3=C2C5=C1	2042.1	226	838	871	9890	C18H10	336210	226		GFF+PUF	4.61566	4.61566	0.172	32.4112	2041	5.52	9.781	-4.261		.	0.172	1440	2880	13000
Benzo[ghi]fluoranthene	1	3180	1.77	GFF	203-12-3	YEIHPPOCKIHUQJ-UHFFFAOYSA-N	C1=CC2=CC=C3C=CC4=CC=CC5=C4C3=C2C5=C1	5665.8	226	900	912	9891	C18H10	650630	226		GFF+PUF	4.61566	4.61566	0.172	32.4112	2041	5.52	9.781	-4.261		.	0.172	1440	2880	13000
Naphthalene	2	1038	1.69	PUF	91-20-3	UFWIBTONFRDIAS-UHFFFAOYSA-N	C1=CC2=CC=CC=C2C=C1	4905.7	128	925	934	9825	C10H8	1752891	128			2.96272	2.96272	0.495	93.1133	69.88	3.3	5.045	-1.745			0.495	900	1800	8100
2xPCB	2	1906.5	1.72	PUF	13029-08-8			72.491	285	529	642	5671	C12H8Cl2	3344.2	222	2xPCB		4.82856	4.82856			3565	5	7.027	-2.027
2xPCB	2	2005.5	1.75	PUF	34883-39-1			105.58	226	645	741	1295	C12H8Cl2	6300.2	222	2xPCB		4.82856	4.82856			4149	5.1	7.041	-1.941
2xPCB	2	2028	1.74	PUF	25569-80-6			167.25	188	479	594	486	C12H8Cl2	16404	222	2xPCB		4.82856	4.82856			3674	5.02	7.011	-1.991
3xPCB	2	2127	1.72	PUF	38444-78-9			822.93	256	695	751	3160	C12H7Cl3	41172	256	3xPCB		5.43261	5.43261			5709	5.31	7.397	-2.087
3xPCB	2	2163	1.77	PUF	38444-73-4			7345.6	256	883	902	4111	C12H7Cl3	519117	256	3xPCB		5.43261	5.43261			7391	5.48	7.507	-2.027
3xPCB	2	2230.5	1.76	PUF	37680-68-5			1417.3	256	774	795	872	C12H7Cl3	79976	256	3xPCB		5.43261	5.43261			180	5.69	7.777	-2.087
3xPCB	2	2253	1.75	PUF	38444-78-9			1203.5	258	684	729	2960	C12H7Cl3	85628	256	3xPCB		5.43261	5.43261			5709	5.31	7.397	-2.087
3xPCB	2	2262	1.79	PUF	53555-66-1			707.63	258	522	609	510	C12H7Cl3	39836	256	3xPCB		5.43261	5.43261			180	5.69	7.853	-2.163
3xPCB	2	2293.5	1.79	PUF	38444-81-4			3860.7	258	844	867	877	C12H7Cl3	456783	256	3xPCB		5.43261	5.43261			1310	5.76	7.847	-2.087
3xPCB	2	2338.5	1.78	PUF	7012-37-5			1964	258	776	836	9552	C12H7Cl3	119660	256	3xPCB		5.43261	5.43261			9143	5.62	7.707	-2.087
4xPCB	2	2347.5	1.77	PUF	38444-93-8			429.71	292	681	723	1577	C12H6Cl4	16849	290	4xPCB		6.03665	6.03665			1410	6.18	8.568	-2.388
4xPCB	2	2352	1.76	PUF	41464-42-0			127.57	292	420	477	735	C12H6Cl4	5784.3	290	4xPCB		6.03665	6.03665			7090	6.34	8.632	-2.292
4xPCB	2	2361	1.78	PUF	62796-65-0			174.04	290	493	584	1017	C12H6Cl4	7580.5	290	4xPCB		6.03665	6.03665			7090	6.34	8.632	-2.292
4xPCB	2	2397	1.79	PUF	62796-65-0			1955.7	290	829	860	1112	C12H6Cl4	147150	290	4xPCB		6.03665	6.03665			7090	6.34	8.632	-2.292
4xPCB	2	2406	1.81	PUF	70362-45-7			1669.7	292	739	811	903	C12H6Cl4	114104	290	4xPCB		6.03665	6.03665			7090	6.34	8.632	-2.292
4xPCB	2	2419.5	1.81	PUF	70362-47-9			413.23	292	546	677	682	C12H6Cl4	17452	290	4xPCB		6.03665	6.03665			7090	6.34	8.632	-2.292
4xPCB	2	2482.5	1.78	PUF	52663-59-9			643.61	290	789	844	1128	C12H6Cl4	49840	290	4xPCB		6.03665	6.03665			9250	6.11	8.352	-2.242
4xPCB	2	2518.5	1.79	PUF	74472-34-7			615.93	292	738	781	833	C12H6Cl4	62167	290	4xPCB		6.03665	6.03665			7090	6.34	8.632	-2.292
4xPCB	2	2572.5	1.76	PUF	35693-99-3			430.8	208	395	636	4756	C12H6Cl4	90953	290	4xPCB		6.03665	6.03665			8670	6.09	8.177	-2.087
5xPCB	2	2581.5	1.82	PUF	76842-07-4			59.289	326	324	386	3846	C12H5Cl5	2269.6	324	5xPCB		6.64069	6.64069			2120	6.98	9.403	-2.423
5xPCB	2	2599.5	1.8	PUF	60145-21-3			780.11	326	632	731	858	C12H5Cl5	64796	324	5xPCB		6.64069	6.64069			2120	6.98	9.403	-2.423
5xPCB	2	2622	1.81	PUF	60145-20-2			157.71	326	527	667	875	C12H5Cl5	6860	324	5xPCB		6.64069	6.64069			2120	6.98	9.403	-2.423
5xPCB	2	2635.5	1.85	PUF	0-00-0			2291.2	236				C12H5Cl5	279958	236	5xPCB		6.64069	6.64069						0
5xPCB	2	2649	1.85	PUF	68194-07-0			365.55	326	672	724	558	C12H5Cl5	27472	324	5xPCB		6.64069	6.64069			2120	6.98	9.414	-2.434
5xPCB	2	2694	1.78	PUF	73575-55-0			177.33	326	628	754	881	C12H5Cl5	12927	324	5xPCB		6.64069	6.64069			2120	6.98	9.403	-2.423
5xPCB	2	2748	1.81	PUF	52663-60-2			25.729	57	578	700	755	C12H5Cl5	105572	324	5xPCB		6.64069	6.64069			7310	6.04	8.463	-2.423
5xPCB	2	2757	1.82	PUF	0-00-0			71.546	326				C12H5Cl5	3652.2	359	5xPCB		6.64069	6.64069						0
5xPCB	2	2775	1.81	PUF	74472-35-8			605.51	326	811	855	931	C12H5Cl5	36439	324	5xPCB		6.64069	6.64069			2120	6.98	9.403	-2.423
6xPCB	2	2770.5	1.86	PUF	0-00-0			89.299	250				C12H4Cl6	12701	292	6xPCB		7.24474	7.24474						0
6xPCB	2	2770.5	1.88	PUF	41411-63-6			120.51	362	347	434	1257	C12H4Cl6	4317.6	358	6xPCB		7.24474	7.24474			6150	7.31	9.627	-2.317
6xPCB	2	2770.5	1.89	PUF	38411-22-2			32.524	311	416	517	770	C12H4Cl6	1926.7	358	6xPCB		7.24474	7.24474			4790	7.12	9.564	-2.444
6xPCB	2	2775	1.84	PUF	0-00-0			123.52	240				C12H4Cl6	10005	240	6xPCB		7.24474	7.24474						0
6xPCB	2	2784	1.81	PUF	0-00-0			42.918	360				C12H4Cl6	1570	404	6xPCB		7.24474	7.24474						0
6xPCB	2	2793	1.87	PUF	35694-06-5			289.58	224	453	580	592	C12H4Cl6	26397	358	6xPCB		7.24474	7.24474			1220	7.44	9.993	-2.553
6xPCB	2	2838	1.92	PUF	32774-16-6			34.729	360	320	557	830	C12H4Cl6	1552.1	358	6xPCB		7.24474	7.24474			2290	7.41	9.963	-2.553
6xPCB	2	2865	1.85	PUF	35694-06-5			32.03	288	317	435	469	C12H4Cl6	2460.5	358	6xPCB		7.24474	7.24474			1220	7.44	9.993	-2.553
6xPCB	2	2937	1.82	PUF	38380-04-0			115.24	360	572	696	3637	C12H4Cl6	4236.8	358	6xPCB		7.24474	7.24474			7390	7.28	8.529	-1.249
6xPCB	2	2968.5	1.88	PUF	0-00-0			25.692	360				C12H4Cl6	652.03	360	6xPCB		7.24474	7.24474						0
6xPCB	2	2973	1.86	PUF	35065-27-1			85.386	360	538	709	2636	C12H4Cl6	3378.7	358	6xPCB		7.24474	7.24474			22000	7.75	10.777	-3.027
7xPCB	2	2932.5	1.87	PUF	52663-69-1			41.734	396	434	641	4040	C12H3Cl7	1576.4	392	7xPCB		7.84878	7.84878			2260	8.27	10.953	-2.683
7xPCB	2	2982	1.91	PUF	0-00-0			265.88	244				C12H3Cl7	18628	337	7xPCB		7.84878	7.84878						0
CEACs as defined by AMAP
HBB	0	3279	1.77	GFF+PUF	87-82-1	CAYGQBVSOZLICD-UHFFFAOYSA-N	BrC1=C(Br)C(Br)=C(Br)C(Br)=C1Br	933.49	549	777	858	9829	C6Br6	37435	557		PUF	6.58576	6.58576	933.944	175655	4699	6.07	9.126	-3.056			933.944	4320	8640	38900
Benzene, 1,3,5-tribromo-2-methoxy-	1	1879.5	1.78	PUF	607-99-8	YXTRCOAFNXQTKL-UHFFFAOYSA-N	COC1=C(Br)C=C(Br)C=C1Br	16975	331	914	918	9866	C7H5Br3O	812175	342	TBA		4.12183	4.12183	8.554	1608.55	419.7	4.48	7.563	-3.083		.	8.554	1440	2880	13000
2,4-Dibromoanisole	1	1650	1.67	PUF	21702-84-1	XGXUGXPKRBQINS-UHFFFAOYSA-N	COC1=CC=C(Br)C=C1Br	3056.4	266	800	876	9723	C7H6Br2O	199354	264	2,4-DBA		3.35308	3.35308	4.12	774.71	162.1	3.85	6.534	-2.684		.	4.12	900	1800	8100
Anisole, 2,3,4,5,6-pentachloro-	1	1996.5	1.89	PUF	1825-21-4	BBABSCYTNHOKOG-UHFFFAOYSA-N	COC1=C(Cl)C(Cl)=C(Cl)C(Cl)=C1Cl	3578.9	280	831	863	9664	C7H3Cl5O	212214	278			4.8358	4.8358	9.773	1837.66	1832	5.45	7.986	-2.536		.	9.773	4320	8640	38900
Tri(2-chloroethyl) phosphate	1	2217	1.55	GFF	115-96-8	HQUQLFOMPYWACS-UHFFFAOYSA-N	ClCCOP(=O)(OCCCl)OCCCl	10846	249	925	926	9795	C6H12Cl3O4P	898109	284	TCEP		2.10725	2.10725	0.486	91.4685	0.9199	1.7	9.203	-7.503	Repr. 1B , Carc. 2, aq. Chronic 2	EU(07), US(1990), OECD HPV, SPIN	0.486	1440	2880	13000
Caffeine	1	2460	1.52	PUF	58-08-2	RYYVLZVUVIJVGH-UHFFFAOYSA-N	CN1C=NC2=C1C(=O)N(C)C(=O)N2C	349.23	194	705	790	9734	C8H10N4O2	37346	194			-0.545646	-0.545646	0.551	103.574	3.162	-0.07	9.289	-9.359		EU (07), ICCA (03), US (1990), OECD HPV, SPIN	0.551	360	720	3240
PeBT	2	2973	1.8	PUF	87-83-2	OZHJEQVYCBTHJT-UHFFFAOYSA-N	CC1=C(Br)C(Br)=C(Br)C(Br)=C1Br	93.679	486	567	707	8924	C7H3Br5	2450.2	482	no std analysed	PUF	6.33043	6.33043	57.822	10871.6	1777	5.43	8.042	-2.612			57.822	4320	8640	38900
isomer of Tri(2-chloroethyl) phosphate	2	2212.5	1.62	GFF				4314.4	249	922	923	9631	C6H12Cl3O4P	347221	284	RT doesn´t match standard		2.10725	2.10725	0.486	91.4685	0.9199	1.7	9.203	-7.503			0.486	1440	2880	13000
Isomer of Tris(2-chloroisopropyl)phosphate	2	2190	1.68	GFF	13674-84-5	KVMPUXDNESXNOH-UHFFFAOYSA-N	CC(CCl)OP(=O)(OC(C)CCl)OC(C)CCl	641.73	277	775	822	9721	C9H18Cl3O4P	39743	326	RT doesn´t match standard		3.35697	3.35697	0.239	44.9309	4.077	2.68	9.446	-6.766	STOT Rep. Exp. 2, Repr. 2	EU(07), US(1990), OECD HPV, SPIN	0.239	4320	8640	38900
Isomer of Tris(3-chloropropyl) phosphate	2	2208	1.69	GFF				440.44	99	608	712	4908	C9H18Cl3O4P	80979	326	RT doesn´t match standard		2.28713	2.28713	0.146	27.475	7.8	3.11	8.723	-5.613			0.146	1440	2880	13000
2,6-Dibromoanisole	2	1992	1.72	PUF				138.45	264	385	452	2630	C7H6Br2O	7232.4	264	RT doesn´t match standard for 2,4-DBA		3.35308	3.35308	4.12	774.719	162.1	3.85	6.534	-2.684			4.12	900	1800	8100
Compounds, previously detcted in Arctic media
Tetrachloroveratrole	1	2010	1.84	PUF	944-61-6	NCYHCGGUQGDEQW-UHFFFAOYSA-N	COC1=C(Cl)C(Cl)=C(Cl)C(Cl)=C1OC	79047	261	761	761	9500	C8H6Cl4O2	8685087	274	Benzene, 1,2,3,4-tetrachloro-5,6-dimethoxy- (Tetrachloroveratrole)	PUF	4.07408	4.07408	4.377	822.97	747.5	4.86	8.494	-3.634	pos. P	.	4.377	4320	8640	38900
Isomer of Benzene, 1,2,4,5-tetrachloro-3,6-dimethoxy-	2	1987.5	1.87	PUF				5106.1	261	612	642	283	C8H6Cl4O2	296559	274	additional isomer to Benzene, 1,2,3,4-tetrachloro-5,6-dimethoxy-		4.07408	4.07408	4.377	822.967	616.2	4.73	8.364	-3.634			4.377	4320	8640	38900
Octachlorostyrene	1	2464.5	1.99	PUF	29082-74-4	RUYUCCQRWINUHE-UHFFFAOYSA-N	ClC(Cl)=C(Cl)C1=C(Cl)C(Cl)=C(Cl)C(Cl)=C1Cl	4515.5	241	503	572	8241	C8Cl8	414890	376			6.63856	6.63856	9.967	1874.22	7921	7.46	9.487	-2.027		.	9.967	4320	8640	38900
Benzene, 1,2,3,4-tetrachloro-	1	1380	1.81	PUF	634-66-2	GBDZXPJXOMHESU-UHFFFAOYSA-N	ClC1=CC=C(Cl)C(Cl)=C1Cl	1543.8	216	844	882	4550	C6H2Cl4	173384	214			4.38942	4.38942	130.035	24452.9	503.6	4.6	6.108	-1.508	Repr. 1B, STOT Rep. Exp. 2, aute&chronic aq. 1	US(1990)	130.035	1440	2880	13000
1,9-Benz-10-anthrone	1	3369	1.77	GFF	82-05-3	HUKPVYBUJRAUAG-UHFFFAOYSA-N	O=C1C2=CC=CC=C2C2=C3C(C=CC=C13)=CC=C2	4003.5	230	928	931	9774	C17H10O	347361	230		GFF+PUF	4.09606	4.09606	0.594	111.712	180.1	4.81	10.378	-5.568		.	0.594	900	1800	8100
9-Fluorenone	1	2194.5	1.68	PUF	486-25-9	YLQWCDOCJODRMT-UHFFFAOYSA-N	O=C1C2=CC=CC=C2C2=CC=CC=C12	103605	180	975	975	9745	C13H8O	33043721	180		PUF	3.10658	3.10658	1.732	325.669	27.8	3.58	8.138	-4.558		.	1.732	360	720	3240
9,10-Anthraquinone	1	2608.5	1.65	GFF	84-65-1	RZVHIXYEVGDQDX-UHFFFAOYSA-N	O=C1C2=CC=CC=C2C(=O)C2=CC=CC=C12	2445.4	152	921	936	9747	C14H8O2	441338	208		PUF	2.91871	2.91871	7.138	1342.25	20.83	3.39	9.407	-6.017	STOT Rep. Exp. 2, carc.2, acute&chronic aq. 1	EU(07), OECD HPV, US(10), SPIN	7.138	900	1800	8100
4H-Cyclopenta[def]phenanthren-4-one	1	2712	1.69	PUF	5737-13-3	IFCBMPOMNSORDG-UHFFFAOYSA-N	O=C1C2=C3C4=C1C=CC=C4C=CC3=CC=C2	3663.5	204	786	855	9795	C15H8O	431704	204		GFF+PUF	3.43831	3.43831	2.141	402.645	64.96	4.14	9.604	-5.464		.	2.141	900	1800	8100
4H-Cyclopenta[def]phenanthren-4-one	1	2712	1.69	GFF	5737-13-3	IFCBMPOMNSORDG-UHFFFAOYSA-N	O=C1C2=C3C4=C1C=CC=C4C=CC3=CC=C2	3550.1	204	869	900	9860	C15H8O	261947	204		GFF+PUF	3.43831	3.43831	2.141	402.645	64.96	4.14	9.604	-5.464		.	2.141	900	1800	8100
Potential CEACs with LRATP
Benzenesulfonamide	1	2005.5	1.44	GFF	98-10-2	KHBQMWCZKVMBLN-UHFFFAOYSA-N	NS(=O)(=O)C1=CC=CC=C1	1736.1	157	861	887	9803	C6H7NO2S	265233	157		GFF+PUF	0.579277	0.579054	25.658	4824.64	3.162	0.31	5.073	-4.763	STOT Rep. Exp. 1 and 2	SPIN	25.658	360	720	3240
2-Methyl-9,10-Anthraquinone	1	2770.5	1.69	GFF	84-54-8	NJWGQARXZDRHCD-UHFFFAOYSA-N	CC1=CC=C2C(=O)C3=CC=CC=C3C(=O)C2=C1	1040.9	222	841	880	9673	C15H10O2	65783	222		GFF+PUF	3.43213	3.43213	3.765	707.919	44.63	3.89	10.733	-6.843		.	3.765	900	1800	8100
Benzonitrile, 2,6-dichloro-	1	1425	1.6	PUF	1194-65-6	YOYAIZYFCNQIRF-UHFFFAOYSA-N	ClC1=CC=CC(Cl)=C1C#N	30.639	138	635	721	9821	C7H3Cl2N	6629.1	171			3.03743	3.03743	62.78	11805.2	29.84	2.74	6.124	-3.384	T aq. With long lasting effects	SPIN	62.78	900	1800	8100
2,4-Dichlorobenzonitrile	1	1299	1.61	PUF	6574-98-7	GRUHREVRSOOQJG-UHFFFAOYSA-N	ClC1=CC=C(C#N)C(Cl)=C1	59.822	171	424	752	7265	C7H3Cl2N	5886.1	171			3.03743	3.03743	62.78	11805.2	34.16	2.83	5.762	-2.932		.	62.78	900	1800	8100
Chloroneb	1	1708.5	1.64	PUF	2675-77-6	PFIADAMVCJPXSF-UHFFFAOYSA-N	COC1=CC(Cl)=C(OC)C=C1Cl	884.49	206	866	875	9827	C8H8Cl2O2	103644	206			2.86599	2.86599	1.952	367.036	86.94	3.44	5.82	-2.38		.	1.952	1440	2880	13000
Pyridine, 2-chloro-6-(trichloromethyl)-	1	1609.5	1.66	PUF	1929-82-4	DCUJJWWUNKIJPH-UHFFFAOYSA-N	ClC1=CC=CC(=N1)C(Cl)(Cl)Cl	7031.4	194	876	881	9694	C6H3Cl4N	811407	229	Nitrapyrin		3.46355	3.46355	212.756	40008.9	82.59	3.41	6.491	-3.081	aq chronic 2	EU (04), US (10), SPIN	212.756	4320	8640	38900
Benzene, 2,4-dichloro-1-methoxy-	1	1227	1.68	PUF	553-82-2	CICQUFBZCADHHX-UHFFFAOYSA-N	COC1=CC=C(Cl)C=C1Cl	511.17	176	730	762	5260	C7H6Cl2O	86126	176	2,4-Dichloroanisole		3.02366	3.02366	4.017	755.324	54.8	3.14	5.285	-2.145		.	4.017	900	1800	8100
Benzene, 1,3,5-trichloro-2-methoxy-	1	1236	1.85	PUF	87-40-1	WCVOGSZTONGSQY-UHFFFAOYSA-N	COC1=C(Cl)C=C(Cl)C=C1Cl	1277.1	195	871	880	9849	C7H5Cl3O	238745	210	2,4,6-Trichloroanisole		3.62771	3.62771	7.55	1419.63	239.2	4.11	6.385	-2.275		.	7.55	1440	2880	13000
2-Naphthalenecarbonitrile	1	1816.5	1.61	PUF	613-46-7	AZKDTTQQTKDXLH-UHFFFAOYSA-N	N#CC1=CC=C2C=CC=CC2=C1	21383	153	918	921	7247	C11H7N	7854561	153		PUF	2.81882	2.81882	2.804	527.341	28.78	2.72	6.403	-3.683		.	2.804	360	720	3240
2,3,5,6-Tetrachloropyridine	1	1366.5	1.73	PUF	2402-79-1	FATBKZJZAHWCSL-UHFFFAOYSA-N	ClC1=CC(Cl)=C(Cl)N=C1Cl	325.94	215	574	781	7161	C5HCl4N	32769	215			3.61211	3.61211	477.486	89787.8	72.03	3.32	6.029	-2.709	acute&chroniq aq 2	EU (07), US (10), OECD HPV, SPIN	477.486	4320	8640	38900
Pyridine, pentachloro-	1	1636.5	1.83	PUF	2176-62-7	DNDPLEAVNVOOQZ-UHFFFAOYSA-N	ClC1=NC(Cl)=C(Cl)C(Cl)=C1Cl	205.16	251	588	669	9746	C5Cl5N	16653	249			4.21615	4.21615	678.767	127617	99.1	3.53	4.121	-0.591		EU (04), US (10)	678.767	4320	8640	38900
1,4-Benzenedicarbonitrile	1	1389	1.4	PUF	623-26-7	BHXFKXOIODIUJO-UHFFFAOYSA-N	N#CC1=CC=C(C=C1)C#N	921.1	98	573	664	585	C8H4N2	416510	128		PUF	1.68544	1.68544	237.334	44625	3.162	0.93	5.617	-4.687	T air pollutant	.	237.334	360	720	3240
Ethanone, 1-(2,3,4-trichlorophenyl)-	1	1758	1.75	PUF	13608-87-2	BXJZZJYNVIDEKG-UHFFFAOYSA-N	CC(=O)C1=CC=C(Cl)C(Cl)=C1Cl	314.01	222	818	838	8650	C8H5Cl3O	39926	222	2’,3’,4’-Trichloroacetophenone		3.34303	3.34303	29.809	5605.33	28.96	3.61	7.397	-3.787		.	29.809	1440	2880	13000
Benzenamine, 2,4,6-tribromo-	1	2113.5	1.7	PUF	147-82-0	GVPODVKBTHCGFU-UHFFFAOYSA-N	NC1=C(Br)C=C(Br)C=C1Br	150.8	331	400	552	7784	C6H4Br3N	5383.3	327					13.422	2523.84	137.6	3.75	9.059	-5.309	STOT RE 2	.	13.4	1440	2880	13000
Benzene, 1-methoxy-2-nitro-	1	1492.5	1.52	PUF	91-23-6	CFBYEGUGFPZCNF-UHFFFAOYSA-N	COC1=CC=CC=C1[N+]([O-])=O	939.32	106	891	907	9637	C7H7NO3	187103	153		PUF	1.75556	1.75556	3.041	571.832	6.434	1.73	6.486	-4.756	Carc. 1B	EU (07), OECD HPV	3.041	900	1800	8100
positional iomer of 3,4-Dichloropropiophenone	2	1996.5	1.6	GFF				717.21	175	815	842	3442	C9H8Cl2O	118956	202	RT doesn´t match standard		3.14871	3.14871	5.95	1118.83	30.85	2.76	6.806	-4.046			5.95	1440	2880	13000
Diphenyl sulfone	2	2586	1.55	GFF	127-63-9	KZTYYGOKRVBIMI-UHFFFAOYSA-N	O=S(=O)(C1=CC=CC=C1)C1=CC=CC=C1	2741.4	125	862	866	9300	C12H10O2S	675424	218			2.92808	2.92808	12.829	2412.32	17.8	2.4	7.392	-4.992			12.829	360	720	3240
Dibenzothiophene sulfone	2	2946	1.55	GFF	1016-05-3	IKJFYINYNJYDTA-UHFFFAOYSA-N	O=S1(=O)C2=CC=CC=C2C2=CC=CC=C12	304.58	216	806	866	9734	C12H8O2S	25377	216		PUF	2.60206	2.60206	7.385	1388.59	24.38	2.61	8.059	-5.449			7.385	900	1800	8100
N-(2-Cyanoethyl)-N-methyl-benzenesulfonamide	2	1951.5	1.57	GFF	218920-78-6	DGKPZSZEFZMITN-UHFFFAOYSA-N	CN(CCC#N)S(=O)(=O)C1=CC=CC=C1	494.62	184	803	838	3842	C10H12N2O2S	48319	224			0.8	0.8	3.635	683.565	3.162	0.56	7.899	-7.339			3.635	900	1800	8100
positional iomer of Chloroneb	2	1479	1.74	PUF				1830.9	206	694	699	9837	C8H8Cl2O2	193200	206	RT doesn´t match standard		2.86599	2.86599	1.952	367.036	86.94	3.44	5.82	-2.38			1.952	1440	2880	13000
positional iomer of Chloroneb	2	1506	1.75	PUF				2679.6	191	819	827	9858	C8H8Cl2O2	704947	206	RT doesn´t match standard		2.86599	2.86599	1.952	367.036	86.94	3.44	5.82	-2.38			1.952	1440	2880	13000
positional iomer of Chlorothanonil	2	1902	1.93	PUF				198.01	86	465	505	5552	C8Cl4N2	54565	264	RT doesn´t match standard		4.10162	4.10162	1731.09	325445	38.06	2.9	7.891	-4.991			1731.09	4320	8640	38900
Isomer of Benzene, 1,2,3-trichloro-4,5-dimethoxy-	2	1614	1.83	PUF				1591.5	242	805	814	9674	C8H7Cl3O2	134460	240		PUF	3.47004	3.47004	2.461	462.699	205.5	4.01	7.514	-3.504			2.461	1440	2880	13000
Isomer of Benzene, 1,2,3-trichloro-4,5-dimethoxy-	2	1906.5	1.73	PUF				16377	227	751	765	9484	C8H7Cl3O2	1229402	240		PUF	3.47004	3.47004	2.461	462.699	205.5	4.01	7.514	-3.504			2.461	1440	2880	13000
Isomer of Benzene, 1,5-dichloro-2-methoxy-3-methyl-	2	1231.5	1.8	PUF				758.66	190	816	825	6189	C8H8Cl2O	112642	190		This isomer not in BA	3.53709	3.53709	3.401	639.606	176.6	3.91	6.013	-2.103			3.401	1440	2880	13000
Isomer of Benzene, 1,5-dichloro-2-methoxy-3-methyl-	2	1402.5	1.77	PUF				45796	190	848	853	6966	C8H8Cl2O	8826680	190		PUF	3.53709	3.53709	3.401	639.606	176.6	3.91	6.013	-2.103			3.401	1440	2880	13000
positional iomer of 1,4-Dibromo-2,5-dimethoxybenzene	2	2212.5	1.62	PUF				1218.2	296	800	806	9711	C8H8Br2O2	71354	294	RT doesn´t match standard		3.19541	3.19541	2.133	401.019	183.3	3.93	7.843	-3.913			2.133	1440	2880	13000
1-Naphthalenecarbonitrile	2	1762.5	1.62	PUF	86-53-3	AZKDTTQQTKDXLH-UHFFFAOYSA-N	N#CC1=CC=C2C=CC=CC2=C1	71977	153	917	919	5018	C11H7N	23406979	153	RT doesn´t match standard for 2-Napgthalenecarbonitrile, must be 1- isomer	PUF	2.81882	2.81882	2.804	527.341	28.78	2.72	6.403	-3.683		.	2.804	360	720	3240
positional isomer of Benzene, pentachloromethyl-	2	1902	1.94	PUF				2144.3	229	751	793	8550	C7H3Cl5	179282	262	RT doesn´t match standard		5.50689	5.50689	51.689	9719.46	2372	5.62	7.122	-1.502			51.689	4320	8640	38900
Potential CEACs without LRATP
1,2-Benzanthraquinone	1	3445.5	1.88	GFF	2498-66-0	LHMRXAIRPKSGDE-UHFFFAOYSA-N	O=C1C2=CC=CC=C2C(=O)C2=C1C=CC1=CC=CC=C21	1236.8	258	894	910	9756	C18H10O2	94456	258		GFF+PUF	3.90818	3.90818	1.182	222.268	96.61	4.4	12.297	-7.897		.	1.182	900	1800	8100
6H-Benzo[cd]pyren-6-one	1	3904.5	2.43	GFF	3074-00-8	CLIKSBRDCNSYNO-UHFFFAOYSA-N	O=C1C2=C3C(C=CC4=C3C3=C1C=CC=C3C=C4)=CC=C2	2938.7	254	911	915	9899	C19H10O	304526	254		GFF	4.42778	4.42778	0.557	104.688	387.7	5.31	11.785	-6.475		.	0.557	1440	2880	13000
Triallate	1	2136	1.85	PUF	2303-17-5	MWBPRDONLNQCFV-UHFFFAOYSA-N	CC(C)N(C(C)C)C(=O)SCC(Cl)=C(Cl)Cl	2552.1	86	720	809	9613	C10H16Cl3NOS	551864	303		PUF	3.80041	3.80041	0.321	60.3521	503.6	4.6	7.909	-3.309	STOT Rep. Exp. 2, acute&chronic aq. 1	EU (07), OECD HPV, SPIN	0.321	1440	2880	13000
Triallate	1	2136	1.85	GFF	2303-17-5	MWBPRDONLNQCFV-UHFFFAOYSA-N	CC(C)N(C(C)C)C(=O)SCC(Cl)=C(Cl)Cl	203.84	86	458	584	7316	C10H16Cl3NOS	32200	303		PUF	3.80041	3.80041	0.321	60.3521	503.6	4.6	7.909	-3.309	STOT Rep. Exp. 2, acute&chronic aq. 1	EU (07), OECD HPV, SPIN	0.321	1440	2880	1300
Dichlofluanid	1	2491.5	1.69	PUF	1085-98-9	WURGXGVFSMYFCG-UHFFFAOYSA-N	CN(C)S(=O)(=O)N(SC(F)(Cl)Cl)C1=CC=CC=C1	629.48	224	835	847	9874	C9H11Cl2FN2O2S2	49337	332		PUF	3.22097	3.22097	0.716	134.567	128.3	3.7	9.511	-5.811	Repr. 2	EU (07), OECD HPV, SPIN	0.716	1440	2880	13000
Dichlofluanid	1	2491.5	1.69	GFF	1085-98-9	WURGXGVFSMYFCG-UHFFFAOYSA-N	CN(C)S(=O)(=O)N(SC(F)(Cl)Cl)C1=CC=CC=C1	261.65	224	635	738	9122	C9H11Cl2FN2O2S2	14851	332		PUF	3.22097	3.22097	0.716	134.567	128.3	3.7	9.511	-5.811	Repr. 2	EU (07), OECD HPV, SPIN	0.716	1440	2880	13000
Carbazole	1	2419.5	1.6	PUF	86-74-8	UJOBWOGCFQCDNV-UHFFFAOYSA-N	N1C2=C(C=CC=C2)C2=C1C=CC=C2	1492.4	167	864	895	9814	C12H9N	330397	167		GFF+PUF	3.09089	3.09089	0.267	50.2812	132.3	3.72	9.044	-5.324	STOT Rep. Exp. 2. carc. 2, chrnic aq. 1	EU (07), OECD HPV, SPIN	0.267	360	720	3240
Carbazole	1	2419.5	1.6	GFF	86-74-8	UJOBWOGCFQCDNV-UHFFFAOYSA-N	N1C2=C(C=CC=C2)C2=C1C=CC=C2	1629.9	167	849	891	9859	C12H9N	206348	167		GFF+PUF	3.09089	3.09089	0.267	50.2812	132.3	3.72	9.044	-5.324	STOT Rep. Exp. 2. carc. 2, chrnic aq. 1	EU (07), OECD HPV, SPIN	0.267	360	720	3240
m-Terphenyl	1	2766	1.72	PUF	92-06-8	YJTKZCDBKVTVBY-UHFFFAOYSA-N	C1=CC=C(C=C1)C1=CC(=CC=C1)C1=CC=CC=C1	6984	230	906	927	4984	C18H14	555791	230		GFF+PUF	5.2677	5.2677	0.845	158.875	2041	5.52	8.122	-2.602	vT aq life with long lasting effects	US (10), SPIN	0.845	900	1800	8100
m-Terphenyl	1	2766	1.72	GFF	92-06-8	YJTKZCDBKVTVBY-UHFFFAOYSA-N	C1=CC=C(C=C1)C1=CC(=CC=C1)C1=CC=CC=C1	425.39	230	539	664	4704	C18H14	19684	230		GFF+PUF	5.2677	5.2677	0.845	158.875	2041	5.52	8.122	-2.602	vT aq life with long lasting effects	US (10), SPIN	0.845	900	1800	8100
o-Terphenyl	1	2361	1.72	PUF	84-15-1	OIAQMFOKAXHPNH-UHFFFAOYSA-N	C1=CC=C(C=C1)C1=CC=CC=C1C1=CC=CC=C1	14617	230	861	896	9111	C18H14	1926635	230		PUF	5.2677	5.2677	1.163	111.712	2041	5.52	8.122	-2.602	acute&chronic aq. 1	US (10), SPIN	1.163	900	1800	8100
p-Terphenyl	1	2829	1.72	PUF	92-94-4	XJKSTNDFUHDPQJ-UHFFFAOYSA-N	C1=CC=C(C=C1)C1=CC=C(C=C1)C1=CC=CC=C1	2437	230	841	896	6875	C18H14	261763	230		PUF	5.2677	5.2677	1.163	218.742	4422	6.03	8.632	-2.602	vT aq life with long lasting effects	US (10), SPIN	1.163	900	1800	8100
Phenol, 4-chloro-2-methyl-	1	1182	1.66	PUF	1570-64-5	RHPUJHQBPORFGV-UHFFFAOYSA-N	CC1=CC(Cl)=CC=C1O	213.53	142	655	756	7091	C7H7ClO	32339	142	PCOC		2.78715	2.78512	0.876	164.798	31.71	2.78	7.115	-4.335	vT aqatic organisms	EU (07), OECD HPV, SPIN	0.876	900	1800	8100
Carbamic acid, butyl-, 3-iodo-2-propynyl ester	1	2059.5	1.52	PUF	55406-53-6	WYVVKGNFXHOCQV-UHFFFAOYSA-N	CCCCNC(=O)OCC#CI	2555.2	182	916	930	9751	C8H12INO2	323043	281	IPBC	PUF	2.5439	2.5439	0.419	78.7227	19.33	2.45	7.759	-5.309	STOT Rep. Exp. 1, acute&chronic aq. 1	EU (04), US (10), SPIN	0.419	360	720	3240
2-(Methylmercapto)benzothiazole	1	1965	1.64	PUF	615-22-5	UTBVIMLZIRIFFR-UHFFFAOYSA-N	CSC1=NC2=CC=CC=C2S1	2451.3	148	876	890	9890	C8H7NS2	708267	181		PUF	3.42594	3.42594	0.232	43.5429	55.64	3.15	9.501	-6.351		.	0.232	360	720	3240
MHC-1	1	2676	1.82	PUF	66321-24-2	MMMYYEWTEBVZHZ-MZXHXKKRSA-N	C[C@@]1(C[C@](Cl)(CBr)[C@@H](Br)C[C@H]1Cl)\C=C\Cl	43.15	91	613	622	9423	C10H13Br2Cl3	32828	396	IUPAC name: Cyclohexane, 2-bromo-1-(bromomethyl)-1,4-dichloro-5-(2-chloroethenyl)-5-methyl-		4.97	4.97	0.696	130.943	5612	6.19	8.014	-1.824		.	0.696	4320	8640	38900
Toluene, 2-bromo-3,5-dimethoxy-	1	1794	1.67	PUF	13321-73-8	RONRLLIJBQHXCI-UHFFFAOYSA-N	COC1=CC(C)=C(Br)C(OC)=C1	1077.8	232	676	720	7465	C9H11BrO2	107352	230			2.94008	2.94008	0.06	11.2205	108.9	3.59	7.06	-3.47		.	0.06	900	1800	8100
1-(2,4,5-Trichlorophenyl)ethanol	2	1492.5	1.89	PUF	14299-54-8	DGKMOQULKJCPHT-UHFFFAOYSA-N	OCCC1=CC(Cl)=C(Cl)C=C1Cl	4462.5	226	815	870	9196	C8H7Cl3O	389455	224			3.30669	3.30669	1.892	355.789	52.57	3.5	8.82	-5.32			1.892	1440	2880	13000
Ethanone, 1-[4-(1-methylethyl)phenyl]-	2	1245	1.74	GFF	645-13-6	PDLCCNYKIIUWHA-UHFFFAOYSA-N	CC(C)C1=CC=C(C=C1)C(C)=O	234.67	147	584	813	7007	C11H14O	67200	162		GFF	2.7759	2.7759	1.622	305.034	11.17	2.98	6.087	-3.107			1.622	900	1800	8100
Ethanone, 1-[4-(1-methylethyl)phenyl]-	2	1812	1.44	GFF	645-13-6	PDLCCNYKIIUWHA-UHFFFAOYSA-N	CC(C)C1=CC=C(C=C1)C(C)=O	1022.2	147	784	798	8517	C11H14O	2264593	162		GFF+PUF	2.7759	2.7759	1.622	305.034	11.17	2.98	6.087	-3.107			1.622	900	1800	8100
Benzene, 4-methoxy-2-methyl-1-nitro-	2	1636.5	1.64	PUF	5367-32-8	RTZOGYCMIMOVHU-UHFFFAOYSA-N	COC1=CC=C(C(C)=C1)[N+]([O-])=O	705.47	150	832	847	7139	C8H9NO3	150680	167			2.26898	2.26898	1.34	251.98	15.77	2.32	6.565	-4.245			1.34	900	1800	8100
Isomer of Quinoline	2	1240.5	1.54	PUF	91-22-5	SMWDFEZZVXVKRB-UHFFFAOYSA-N	C1=CC=C2N=CC=CC2=C1	481.52	129	752	819	5057	C9H7N	185097	129	RT match to standard not 100% sure, RT shift in sample from coeluting compound	This isomer not in BA	1.74505	1.738	1.258	173.383	10.95	2.08	6.631	-4.551			1.258	360	720	3240
9-Chlorophenanthrene	2	2568	1.75	PUF	947-72-8	CJWHZQNUDAJJSB-UHFFFAOYSA-N	ClC1=CC2=CC=CC=C2C2=CC=CC=C12	787.59	214	816	856	5146	C14H9Cl	56868	212			4.55624	4.55624	1.17	219.929	4168	4.99	7.799	-2.809			1.17	900	1800	8100
2-Propenoic acid, 3-phenyl-, 2-phenylethyl ester	2	2797.5	1.68	GFF	103-53-7	MJQVZIANGRDJBT-UHFFFAOYSA-N	O=C(OCCC1=CC=CC=C1)\C=C\C1=CC=CC=C1	1135.4	104	904	928	8361	C17H16O2	292977	252			4.52845	4.52845	1.091	68.3978	471	4.56	9.301	-4.741			cis 4.365 hrs	360	720	3240
Benzenesulfonamide, N-ethyl-4-methyl-	2	2181	1.55	GFF	80-39-7	OHPZPBNDOVQJMH-UHFFFAOYSA-N	CCNS(=O)(=O)C1=CC=C(C)C=C1	156.15	184	629	750	1915	C9H13NO2S	15791	199			1.67318	1.67303	1.061	199.573	8.014	1.87	6.125	-4.255			1.061	900	1800	8100
3-Phenyl-2-benzofuran-1(3H)-one	2	2577	1.59	GFF	5398-11-8	SQFMIHCARVMICF-UHFFFAOYSA-N	O=C1OC(C2=CC=CC=C12)C1=CC=CC=C1	249.6	210	805	829	9385	C14H10O2	15925	210			3.31	3.31	0.988	185.72	25.64	2.64	7.016	-4.376			0.988	360	720	3240
Isomer of p-Quaterphenyl	2	3783	2.38	GFF				565.87	306	737	804	9805	C24H18	39062	306	RT doesn´t match standard	GFF+PUF	6.91492	6.91492	0.921	173.167	9646	7.28	11.281	-4.001			0.921	900	1800	8100
à,à'-Dihydroxy-m-diisopropylbenzene	2	1582.5	1.66	GFF	1999-85-5	UGPWRRVOLLMHSC-UHFFFAOYSA-N	CC(C)(O)C1=CC(=CC=C1)C(C)(C)O	2764.7	179	845	847	7533	C12H18O2	307420	194			1.83285	1.83285	0.906	170.281	15.45	2.31	8.264	-5.954			0.906	900	1800	8100
Cyclohexane, isocyanato-	2	1834.5	1.07	GFF	3173-53-3	KQWGXHWJMSMDJJ-UHFFFAOYSA-N	O=C=NC1CCCCC1	192.51	97	882	902	9760	C7H11NO	1773488	125			1.75665	1.75665	0.856	160.896	48.23	3.06	4.223	-1.163			0.856	360	720	3240
Cyclohexane, isocyanato-	2	1839	1.6	GFF	3173-53-3	KQWGXHWJMSMDJJ-UHFFFAOYSA-N	O=C=NC1CCCCC1	1579.3	60	738	811	6381	C7H11NO	355288	125			1.75665	1.75665	0.856	160.896	48.23	3.06	4.223	-1.163			0.856	360	720	3240
Benzene, 1,1'-(1-methyl-1,2-ethanediyl)bis-	2	1695	1.83	PUF	5814-85-7	XLWCIHPMASUXPI-UHFFFAOYSA-N	CC(CC1=CC=CC=C1)C1=CC=CC=C1	1924.9	105	859	902	4744	C15H16	975105	196			4.79663	4.79663	0.812	152.676	1173	5.16	6.621	-1.461			0.812	900	1800	8100
Benzene, 1,1'-(1,3-propanediyl)bis-	2	1888.5	1.82	PUF	1081-75-0	VEAFKIYNHVBNIP-UHFFFAOYSA-N	C(CC1=CC=CC=C1)CC1=CC=CC=C1	31503	92	901	906	9032	C15H16	15529608	196			4.95418	4.95418	0.798	150.084	85.14	3.43	4.891	-1.461			0.798	900	1800	8100
7-Methylindan-1-one	2	1524	1.63	PUF	39627-61-7	DOXALDISRDZGNV-UHFFFAOYSA-N	CC1=CC=CC2=C1C(=O)CC2	2614.3	146	821	851	3654	C10H10O	585070	146			2.34998	2.34998	0.735	138.24	6.826	2.66	6.327	-3.667			0.735	900	1800	8100
[2.2]Paracyclophane	2	2280	1.76	PUF	1633-22-3	OOLUVSIJOMLOCB-UHFFFAOYSA-N	C1CC2=CC=C(CCC3=CC=C1C=C3)C=C2	374.06	104	627	731	9671	C16H16	146283	208			5.07273	5.07273	0.652	122.63	334.1	4.33	6.184	-1.854			0.652	900	1800	8100
Isomer of 2-Chloro-5-methylphenol, methyl ether	2	1083	1.69	PUF				4482.6	156	912	922	5254	C8H9ClO	796761	156	RT doesn´t match standard, Not P&B Chloroxylenol CAS 88-04-0		2.93	2.93	0.616	115.879	66.33	3.27	5.242	-1.972			0.616	900	1800	8100
Benzene, (1-pentylhexyl)-	2	1596	2.21	PUF	4537-14-8	WCABIRIFXVXGQH-UHFFFAOYSA-N	CCCCCC(CCCCC)C1=CC=CC=C1	3350.7	91	858	883	6997	C17H28	4343739	232			6.7748	6.7748	0.573	107.718	2028	7.45	6.834	0.616			0.573	360	720	3240
Benzene, (1-propyloctyl)-	2	1623	2.21	PUF	4536-86-1	NSQAXMRLBNXEHK-UHFFFAOYSA-N	CCCCCCCC(CCC)C1=CC=CC=C1	1429.1	189	895	900	8613	C17H28	353641	232			6.7748	6.7748	0.573	107.718	2028	7.45	6.834	0.616			0.573	360	720	3240
1H-Isoindole-1,3(2H)-dione, 2-(phenylmethyl)-	2	2770.5	1.6	GFF	2142-01-0	WITXFYCLPDFRNM-UHFFFAOYSA-N	O=C1N(CC2=CC=CC=C2)C(=O)C2=CC=CC=C12	1292.6	219	852	879	9146	C15H11NO2	125600	237			2.64157	2.64157	0.438	82.3483	61.58	3.22	10.351	-7.131			0.438	900	1800	8100
p-Dicyclohexylbenzene	2	2356.5	1.98	PUF	1087-02-1	QQFSIGWYINAJOB-UHFFFAOYSA-N	C1CCC(CC1)C1=CC=C(C=C1)C1CCCCC1	1462.8	242	699	799	9765	C18H26	216749	242		PUF	6.20322	6.20322	0.418	78.665	6559	7.63	7.682	-0.052			0.418	900	18000	8100
Phenol, 2-methoxy-	2	840	1.24	GFF	90-05-1	LHGVFZTZFXWLCP-UHFFFAOYSA-N	COC1=CC=CC=C1O	64.872	109	633	806	9566	C7H8O2	36098	124			1.51201	1.51156	0.359	67.4961	3.451	1.32	5.629	-4.309			0.359	360	720	3240
Isomer of Benzene, 1,1'-ethylidenebis[3,4-dimethyl-	2	1951.5	1.93	PUF				3676.2	223	713	724	9715	C18H22	549369	238	RT doesn´t match standard	This isomer not in BA	6.40574	6.40574	0.332	62.3462	7072	6.34	7.753	-1.413			0.332	900	1800	8100
10,18-Bisnorabieta-8,11,13-triene	2	2442	1.97	GFF	32624-67-2	XWUVCHRGACWHNI-UHFFFAOYSA-N	CC(C)C1=CC=C2C3CCCC(C)C3CCC2=C1	3294.5	227	813	837	7114	C18H26	277118	242	IUPAC Name 1-methyl-7-propan-2-yl-1,2,3,4,4a,9,10,10a-octahydrophenanthrene		5.96	5.96	0.329	61.7791	15410	6.85	6.983	-0.133			0.329	900	1800	8100
1H-Inden-1-one, 2,3-dihydro-5,7-dimethyl-	2	1636.5	1.69	PUF	6682-69-5	NXOHUHPRFMGJSZ-UHFFFAOYSA-N	CC1=CC(C)=C2C(=O)CCC2=C1	5855.1	160	843	857	3583	C11H12O	958620	160			2.8634	2.8634	0.322	60.4784	15.68	3.2	6.824	-3.624			0.322	900	1800	8100
2(4H)-Benzofuranone, 5,6,7,7a-tetrahydro-4,4,7a-trimethyl-	2	1776	1.68	GFF	15356-74-8	IMKHDCBNRDRUEB-UHFFFAOYSA-N	CC12CCCC(C)(C)C1=CC(=O)O2	1008.8	111	822	915	7222	C11H16O2	438229	180			2.56756	2.56756	0.304	57.2093	15.21	2.3	4.428	-2.128			0.304	900	1800	8100
Level 3 compounds
Aromatic	3	1722	1.63	GFF				21840	163	867	873	7525	C11H14O2	4175934	178
Aromatic	3	1888.5	1.96	PUF				4730.9	219	807	847	7222	C15H22O2	889625	234
Aromatic	3	1911	2.24	PUF				6829.7	91	851	875	6881	C19H32	15473370	260
Aromatic	3	2221.5	0.77	GFF				70.66	149	511	765	6082	C8H6O3	10933	150
Aromatic	3	2221.5	2.32	PUF				994.86	88	821	898	6267	C20H40O2	241592	312
C a e	3	1794	2.26	PUF				1243.3	90	806	876	722	C19H36O3	270944	312	C a e
C a e	3	1893	2.13	PUF				3880.9	112	889	913	3683	C17H34O3	1302970	286	C a e
C a e	3	2932.5	1.98	GFF				17172	94	859	870	2578	C23H38O3	14528614	362	C a e
C a e	3	2955	1.98	GFF				15393	94	840	896	3486	C23H38O3	7376225	362	C a e
C a e	3	2986.5	1.97	GFF				16285	94	871	874	2159	C23H38O3	6946942	362	C a e
C a e	3	3045	1.96	GFF				16162	94	879	883	2942	C23H38O3	20129689	362	C a e
C a e	3	3112.5	1.95	GFF				16346	94	892	896	3668	C23H38O3	6240674	362	C a e
C a e	3	3157.5	1.99	GFF				11981	94	898	903	4161	C23H38O3	5861375	362	C a e
C a e	3	3211.5	1.93	PUF				2759.5	94	833	862	2161	C25H42O3	1128136	390	C a e
C a e	3	3211.5	1.94	GFF				5490.2	94	872	890	3890	C23H38O3	3532601	362	C a e
C a e	3	3220.5	1.97	PUF				5022	94	837	852	1715	C23H38O3	3218132	362	C ae
C a e	3	3220.5	1.98	GFF				9942.1	94	885	889	3032	C23H38O3	4234940	362	C a e
C a e	3	3247.5	2.05	GFF				795.88	94	822	871	3624	C25H42O3	822793	390	C a e
C a e	3	3279	2.05	GFF				930.06	94	820	862	2380	C23H38O3	337752	362	C a e
C a e	3	3310.5	2.07	GFF				814.37	94	784	826	2320	C23H38O3	360993	362	C a e
C a e	3	3315	1.85	GFF				67.251	241	605	783	3574	C25H42O3	22268	390	C a e
C a e	3	3319.5	1.98	GFF				6152.8	94	867	884	3712	C23H38O3	2217392	362	C a e
C a e	3	3369	2.13	GFF				808.84	94	825	865	1869	C20H32O3	397000	320	C a e
C a e	3	3423	2.16	GFF				1721.9	94	840	846	2362	C23H38O3	531329	362	C a e
C a e	3	3427.5	2.22	GFF				638.76	94	840	863	2527	C23H38O3	389617	362	C a e
C a e	3	3526.5	2.38	GFF				411.71	94	822	863	2280	C23H38O3	203277	362	C a e
Halogenated	3	1204.5	1.85	PUF				32.792	159	486	643	4279	C7H5Cl3	12843	194
Halogenated	3	1479	1.58	PUF				422.28	170	664	758	4142	C8H7ClO2	43114	170
Halogenated	3	1542	1.97	PUF				163.79	268	674	749	9434	C6Cl5F	9834.5	266
Halogenated	3	1564.5	1.87	PUF				1563.7	229	599	673	2624	C10H14BrN	111531	227
Halogenated	3	1704	1.8	PUF				1509.9	242	704	842	8157	C8H4Cl4	124408	240
Halogenated	3	1744.5	1.92	PUF				58.756	159	583	725	7000	C9H9Cl3O	5734.4	238
Halogenated	3	1753.5	1.85	PUF				706.31	169	494	704	3601	C8H4Cl4	121414	240
Halogenated	3	1776	1.86	PUF				5332.5	234	674	706	6279	C8H8BrClO	419033	234
Halogenated	3	1879.5	2.11	PUF				691.79	203	696	703	5214	C15H23Br	110676	282
Halogenated	3	1902	1.91	PUF				596.91	274	656	885	9225	C8H3Cl5	31405	274
Halogenated	3	1911	1.72	PUF				1603.9	222	593	624	4615	C9H9Cl3	123593	222	3xCl+3xMe Benzene or 2xCl-Biphenyl
Halogenated	3	2104.5	1.61	GFF				338.83	173	519	796	509	C15H10Cl2O3	30887	308
Halogenated	3	2104.5	1.7	GFF				147.87	194	728	785	3141	C10H9Cl2NO	84424	229
Halogenated	3	2149.5	1.78	PUF				722.43	275	506	643	4964	C7Cl5N	61318	273
Halogenated	3	2680.5	1.64	GFF				479.89	187	609	739	4273	C7H3Cl2NO	60905	187
Halogenated/PAC	3	2887.5	1.8	PUF				99.389	246	424	605	1436	C14H8Cl2	8411.4	246	Di Chloro PAH
PAC	3	1429.5	1.77	PUF				4298.2	168	799	826	9663	C13H12	794129	168	PAH
PAC	3	1447.5	1.77	PUF				5125.6	141	882	920	9790	C12H12	1433452	156	PAH Et/Dieth Naphthalene
PAC	3	1506	1.7	PUF				17871	152	846	848	9868	C12H8	5102270	152	PAH
PAC	3	1510.5	1.83	PUF				68.84	136	856	914	6716	C13H14	29483	170	PAH, triMe
PAC	3	1578	1.84	PUF				2680	170	844	905	7964	C13H14	291275	170	PAH
PAC	3	1591.5	1.8	PUF				5986.7	167	891	911	2319	C14H14	1242774	182	PAH diME Biphenyl
PAC	3	1623	1.79	PUF				349.71	183	795	840	1599	C14H14	63838	182	PAH diME Biphenyl
PAC	3	1623	1.84	PUF				3823	155	815	860	3051	C13H14	1297363	170	PAH triMe Naphthalene
PAC	3	1627.5	1.77	PUF				13182	87	862	902	6543	C13H12	11022749	168	PAH, Me Biphenyl or Diphenylmethane Drug?
PAC	3	1627.5	1.8	PUF				41.446	188	714	847	2981	C13H12	2705.5	168	PAH, Me Biphenyl or Diphenylmethane Drug?
PAC	3	1636.5	1.69	GFF				428.11	152	608	764	9799	C12H8	113855	152	PAH
PAC	3	1641	1.82	PUF				1032.5	155	776	882	5619	C13H14	540684	170	PAH
PAC	3	1686	1.8	PUF				2702.5	155	850	902	5510	C13H14	703515	170	PAH triMe Naphthalene
PAC	3	1686	1.89	PUF				5246.2	169	855	867	4564	C14H16	1208809	184	PAH Me/-i-Prop Naphthalene
PAC	3	1695	1.66	PUF				2155.4	132	850	857	4924	C11H12O	539847	160	oxy PAH
PAC	3	1695	1.73	PUF				6368.8	167	892	899	1378	C14H14	1707855	182	PAH Et/DiMe Biphenyl
PAC	3	1704	1.73	PUF				604.28	159	638	685	2290	C12H14O	118764	174	oxy PAH
PAC	3	1704	1.75	PUF				4235.7	167	838	845	1399	C14H14	1081203	182	PAH Et Biphenyl
PAC	3	1717.5	1.6	PUF				1891.2	153	860	885	6425	C12H10	341732	154	PAH, not Biphenyl
PAC	3	1726.5	1.79	PUF				232.81	195	873	896	8343	C12H8O	32880	168
PAC	3	1735.5	1.87	PUF				19858	169	860	873	5881	C14H16	3772765	184	PAH Me/-i-Prop Naphthalene
PAC	3	1758	1.79	PUF				12619	167	895	899	3646	C14H14	4132986	182	PAH Ethyl Biphenyl
PAC	3	1758	1.82	PUF				2576.9	196	776	807	1565	C15H16	443636	196	PAH TriMe Biphenyl or similar
PAC	3	1758	1.87	PUF				4367.7	142	823	827	4206	C14H16	1332016	184	PAH Buthyl Naphthalene
PAC	3	1780.5	1.82	PUF				8482.3	179	858	875	6215	C15H14	1850933	194	PAH
PAC	3	1785	1.62	PUF				7017.4	156	861	893	6672	C11H8O	1399515	156	oxy PAH
PAC	3	1789.5	1.85	PUF				1566.7	184	665	723	3553	C14H16	367605	184	PAH Me/-i-Prop Naphthalene
PAC	3	1794	1.78	PUF				2625.9	181	739	804	648	C15H16	1772288	196	PAH TriMe Biphenyl or similar
PAC	3	1803	1.86	PUF				3348.8	184	848	867	7802	C14H16	615757	184	PAH Me/triMe Naphthalene
PAC	3	1816.5	1.8	PUF				7333.3	182	882	895	2340	C14H14	1218365	182	PAH DiMe Biphenyl
PAC	3	1821	1.83	PUF				1852.2	184	737	815	7223	C14H16	224076	184	PAH Me/triMe Naphthalene
PAC	3	1821	1.97	PUF				445.42	223	637	676	2691	C18H22	41385	238	PAH Di i-prop Biphenyl
PAC	3	1825.5	1.82	PUF				6881.5	181	821	882	4520	C15H16	1313273	196	PAH i-prop Biphenyl
PAC	3	1861.5	1.78	PUF				37346	180	913	946	5052	C14H12	6047015	180	PAH
PAC	3	1866	1.79	PUF				14450	182	888	897	1646	C14H14	2311008	182	PAH Et/DiMe Biphenyl
PAC	3	1884	1.79	PUF				10450	76	832	834	3525	C13H10O	9893713	182
PAC	3	1893	1.83	PUF				660.44	210	571	585	2392	C14H14N2	88290	210	PAH DiEthyl Biphenyl
PAC	3	1906.5	1.56	PUF				366	168	541	795	2617	C12H8O	41585	168
PAC	3	1906.5	1.67	PUF				2224.8	167	804	849	9776	C12H9N	547200	167
PAC	3	1906.5	1.77	PUF				1253.8	85	854	857	4318	C13H10O	838341	182
PAC	3	1906.5	1.8	PUF				71879	181	821	847	2969	C13H10O	41065602	182
PAC	3	1911	1.63	PUF				1243.5	170	858	899	5005	C12H10O	150751	170
PAC	3	1915.5	1.56	PUF				46.287	159	315	479	957	C10H8OS	6345	176
PAC	3	1920	1.55	PUF				307.43	168	572	781	5187	C12H8O	493198	168
PAC	3	1920	1.67	PUF				2334.1	166	782	822	9673	C12H9N	551541	167
PAC	3	1933.5	1.9	PUF				1246.6	198	564	634	1695	C15H18	1727246	198	PAH
PAC	3	1938	1.81	PUF				14264	196	846	858	1884	C15H16	2431301	196	PAH TriMe Biphenyl
PAC	3	1942.5	1.67	PUF				709.31	167	729	783	9787	C12H9N	110296	167
PAC	3	1942.5	1.75	PUF				1222.3	116	745	801	2771	C15H14	260713	194
PAC	3	1947	1.78	PUF				73143	182	882	886	3276	C13H10O	14954932	182
PAC	3	1956	1.66	PUF				2383.3	170	810	858	4390	C12H10O	420392	170
PAC	3	1956	1.82	PUF				6831.1	196	847	900	1988	C15H16	1174193	196	PAH triMe Biphenyl
PAC	3	1969.5	1.81	PUF				2977.1	194	837	847	6665	C15H14	389740	194	PAH
PAC	3	1974	1.71	PUF				2346.4	176	872	907	9891	C14H10	354305	178	PAH
PAC	3	1983	1.69	PUF				3752	184	885	907	5975	C13H12O	465165	184
PAC	3	1992	1.66	PUF				769.8	167	699	791	9686	C12H9N	132273	167
PAC	3	2001	1.84	PUF				28259	196	831	859	5853	C14H12O	7296742	196
PAC	3	2023.5	1.81	PUF				4370.3	194	813	835	3744	C15H14	1727115	194	PAH
PAC	3	2028	1.79	PUF				35053	180	951	973	5696	C14H12	8112088	180	PAH
PAC	3	2046	1.79	PUF				43645	180	926	959	5550	C14H12	9655008	180	PAH
PAC	3	2050.5	1.83	PUF				45126	181	833	855	5406	C14H12O	15695661	196
PAC	3	2059.5	1.74	PUF				24391	180	910	917	2194	C14H12	3982089	180	PAH
PAC	3	2059.5	1.83	PUF				62524	196	840	864	7195	C14H12O	14206594	196	PAH
PAC	3	2064	1.8	PUF				5969.4	194	819	833	3946	C15H14	1043271	194	PAH
PAC	3	2082	1.77	PUF				27864	180	937	960	5017	C14H12	7970469	180	PAH
PAC	3	2082	1.8	PUF				3419.4	194	694	774	4536	C15H14	1485460	194	PAH
PAC	3	2082	1.84	PUF				28408	196	810	824	5596	C14H12O	11365670	196
PAC	3	2091	1.62	PUF				17830	140	927	928	9452	C12H8O	4052932	168
PAC	3	2100	1.65	PUF				1997.3	179	820	873	2545	C13H9N	520711	179	N-containin 3-Ring
PAC	3	2113.5	1.82	PUF				13142	196	827	869	6270	C14H12O	3395151	196
PAC	3	2158.5	1.63	PUF				456.51	178	842	854	1305	C13H9N	66297	179	N-containing 3-Ring
PAC	3	2194.5	1.83	PUF				7403.5	179	800	818	2473	C15H14	1883867	194	PAH
PAC	3	2208	1.71	PUF				97065	184	945	947	4076	C12H8S	15669803	184
PAC	3	2208	1.83	PUF				8846.9	194	861	879	5363	C15H14	3476524	194	PAH
PAC	3	2221.5	1.82	PUF				9686.2	179	857	869	3473	C15H14	3648357	194	PAH
PAC	3	2235	1.63	PUF				306.8	180	637	794	2708	C13H8O	64373	180	oxy-PAH, maybe 9-Fluorenone
PAC	3	2253	1.74	PUF				27.36	68	832	846	9893	C14H10	103307	178	PAH
PAC	3	2262	1.81	PUF				5638.7	179	867	879	3020	C15H14	3335029	194	PAH
PAC	3	2298	1.72	PUF				12861	194	883	908	1848	C14H10O	2356751	194	oxy-PAH, maybe 9-Fluorenone
PAC	3	2320.5	1.64	PUF				188.74	178	645	803	9853	C14H10	42626	178	PAH
PAC	3	2329.5	1.67	PUF				1645.4	105	848	878	4984	C15H14O	1523178	210
PAC	3	2329.5	1.73	PUF				3076.8	218	800	856	2090	C17H14	303016	218
PAC	3	2352	1.7	PUF				56156	204	915	923	1859	C16H12	9399894	204	PAH
PAC	3	2356.5	0.52	PUF				22.281	202	405	743	2061	C16H12	1219.1	204
PAC	3	2365.5	1.76	PUF				1496.1	197	835	867	2602	C13H10S	309726	198
PAC	3	2392.5	1.78	PUF				1698.2	208	803	840	2220	C15H12O	455014	208
PAC	3	2397	1.76	PUF				5537.5	192	875	894	1345	C15H12	801171	192	PAH Me Anthr/Phen
PAC	3	2397	1.76	GFF				813.91	192	744	796	1616	C15H12	73466	192	PAH
PAC	3	2415	1.63	PUF				748.2	182	808	825	4338	C13H10O	114706	182
PAC	3	2424	1.71	PUF				3119.2	165	855	867	1715	C14H10O	1278781	194
PAC	3	2460	1.78	PUF				1549.4	197	812	841	9022	C14H12S	205475	212
PAC	3	2464.5	1.79	PUF				7609	212	870	908	2251	C14H12S	684810	212
PAC	3	2509.5	1.72	PUF				1335.4	218	804	815	5366	C17H14	121680	218	PAH
PAC	3	2527.5	1.72	PUF				40532	204	957	964	4614	C16H12	5848535	204	PAH
PAC	3	2554.5	1.61	PUF				144.7	180	605	745	2559	C12H8N2	26599	180
PAC	3	2554.5	1.61	GFF				1228.4	152	815	819	9389	C13H8O	237076	180	PAH	only PAH
PAC	3	2581.5	1.65	PUF				4489.2	196	883	894	8953	C13H8O2	796758	196	oxy PAH
PAC	3	2581.5	1.65	GFF				4447	196	871	887	9033	C13H8O2	593555	196	oxy PAH
PAC	3	2586	1.79	PUF				1374.7	206	800	850	8080	C16H14	387731	206	PAH
PAC	3	2595	1.66	PUF				255.26	165	653	689	9672	C15H10O2	49495	222	oxy PAH
PAC	3	2599.5	1.66	PUF				163.16	165	680	734	9690	C15H10O2	27123	222	oxy Pah
PAC	3	2613	1.79	PUF				1203	206	701	800	8324	C16H14	202197	206
PAC	3	2635.5	1.78	PUF				440.22	206	777	844	2167	C16H14	56728	206	Me PAH
PAC	3	2703	1.74	PUF				122957	202	966	966	9805	C16H10	23427030	202	PAH
PAC	3	2707.5	1.71	GFF				182.68	165	608	755	9274	C15H10O2	23632	222	oxy PAH
PAC	3	2748	1.73	GFF				2208	202	670	788	9307	C16H10	184965	202	PAH
PAC	3	2752.5	1.77	PUF				13955	218	913	920	4768	C16H10O	1910327	218
PAC	3	2775	1.66	PUF				109.65	202	557	731	1117	C15H9N	17013	203
PAC	3	2793	1.7	PUF				803.41	242	683	733	8195	C19H14	48849	242	oxy PAH
PAC	3	2797.5	1.75	PUF				6647.8	218	888	898	3660	C16H10O	996783	218
PAC	3	2806.5	1.73	GFF				11767	202	845	865	9829	C16H10	1382631	202	PAH
PAC	3	2824.5	1.74	PUF				2885.3	244	822	843	5559	C19H16	212443	244	PAH
PAC	3	2878.5	1.72	PUF				2203.1	244	808	830	634	C19H16	162575	244
PAC	3	2892	1.73	PUF				599	242	703	755	1859	C19H14	43679	242	PAH
PAC	3	2892	1.77	PUF				1896.5	215	840	873	3702	C17H12	312851	216
PAC	3	2892	1.77	GFF				1622.1	216	813	918	2113	C17H12	178525	216	PAH
PAC	3	2937	1.76	GFF				877.15	216	809	887	2764	C17H12	94027	216
PAC	3	3126	1.73	PUF				460.75	230	605	725	8942	C17H10O	29881	230	oxy PAH
PAC	3	3126	1.74	GFF				3218.3	230	862	885	9829	C17H10O	187964	230	oxy PAH
PAC	3	3175.5	1.73	GFF				1337.3	230	823	870	9597	C17H10O	82907	230	oxy PAH
PAC	3	3180	1.74	PUF				880.87	228	720	801	8367	C18H12	63756	228	PAH
PAC	3	3180	1.75	GFF				2079.4	228	669	702	8560	C18H12	117528	228	PAH
PAC	3	3211.5	1.73	GFF				3758	230	849	862	9866	C17H10O	252341	230	oxy PAH
PAC	3	3225	1.81	PUF				437.1	258	626	936	1965	C18H10O2	39115	258
PAC	2	3243	1.77	GFF				3558.2	228	905	944	9567	C18H12	229402	228	PAH
PAC	3	3270	1.76	PUF				6569.1	228	752	920	9336	C18H12	646089	228	or PAH or part of BDE ISTD 47
PAC	3	3369	1.88	PUF				70.996	242	406	742	962	C19H14	9046.4	242	Me PAH
PAC	3	3373.5	1.88	GFF				589.6	242	777	821	8308	C19H14	101636	242	Me PAH
PAC	3	3391.5	1.89	GFF				669.75	242	710	828	7918	C19H14	45285	242	Me PAH
PAC	3	3414	1.92	GFF				304.98	242	678	783	8143	C19H14	15723	242	Me PAH
PAC	3	3418.5	1.89	GFF				636.36	254	811	887	2665	C20H14	49453	254	PAH
PAC	3	3436.5	1.94	GFF				678.62	242	747	832	5861	C19H14	42307	242	Me PAH
PAC	3	3441	1.78	GFF				655.86	217	810	883	3627	C16H11N	73920	217
PAC	3	3553.5	2.17	GFF				67.078	254	424	783	1886	C20H14	4268.1	254
PAC	3	3562.5	2.01	GFF				409.51	258	786	862	9695	C18H10O2	28909	258	oxy PAH
PAC	3	3562.5	2.11	GFF				32.742	266	408	550	2448	C21H14	2755.4	266
PAC	3	3598.5	2.13	GFF				83.445	278	372	855	2420	C22H14	6830.9	278
PAC	3	3607.5	2.13	GFF				156.97	254	530	768	9614	C19H10O	7382	254	oxy PAH
PAC	3	3643.5	2.24	PUF				189.73	252	599	760	5245	C20H12	26248	252	P&B if Benzo(b)fluranthene of Benzo(a)pyrene
PAC	3	3643.5	2.24	GFF				9899.2	252	945	947	7101	C20H12	1204417	252	P&B if Benzo(b)fluranthene of Benzo(a)pyrene
PAC	3	3657	2.18	GFF				740.16	254	826	860	9897	C19H10O	77999	254	oxy PAH
PAC	3	3657	2.25	GFF				4016.1	252	915	919	5670	C20H12	311226	252	P&B if Benzo(b)fluranthene of Benzo(a)pyrene
PAC	3	3670.5	2.25	GFF				4790.4	252	932	935	5159	C20H12	465092	252	P&B if Benzo(b)fluranthene of Benzo(a)pyrene
PAC	3	3693	2.22	GFF				834.36	254	848	884	9894	C19H10O	80007	254	oxy PAH
PAC	3	3702	2.31	GFF				265.43	252	684	884	1980	C20H12	38191	252	P&B if Benzo(b)fluranthene of Benzo(a)pyrene
PAC	3	3715.5	2.3	GFF				112.6	252	549	825	2111	C20H12	10555	252	P&B if Benzo(b)fluranthene of Benzo(a)pyrene
PAC	3	3814.5	2.42	GFF				6594.6	252	948	950	7800	C20H12	697717	252	P&B if Benzo(b)fluranthene of Benzo(a)pyrene
PAC	3	3837	2.45	GFF				1247.5	252	871	924	5803	C20H12	143309	252	P&B if Benzo(b)fluranthene of Benzo(a)pyrene
PAC	3	3855	2.54	GFF				223.09	278	608	783	9632	C22H14	17466	278
PAC	3	3904.5	2.51	GFF				240.59	252	557	803	2131	C20H12	21014	252	PAH
Phth	3	1875	1.61	PUF				121.34	154	386	719	433	C16H18O4	17436	274	Phthalate
Phth	3	2127	1.69	GFF				56006	149	904	919	1559	C15H20O4	15897144	264	Phth
Phth	3	2127	1.8	GFF				104.21	268	803	852	1882	C15H20O4	4536.5	264	Phth
Phth	3	2212.5	1.81	PUF				521.91	189	896	918	607	C18H26O4	316048	306	Phthalate
Phth	3	2212.5	2.15	PUF				282.98	270	613	875	1117	C17H24O4	36367	292	Phthalate
Phth	3	2226	0.3	GFF				35.845	150	428	676	439	C17H24O4	4565.5	292	Phthalate
Phth	3	2226	0.62	GFF				53.748	223	655	846	669	C20H30O4	1837.8	334	Phthalate
Phth	3	2226	0.69	GFF				40.803	104	484	741	1198	C16H20O4	7421.6	276	Phthalate
Phth	3	2226	4.26	GFF				75.448	149	460	729	1018	C18H18O4	14368	298	Phthalate
Phth	3	2235	0.37	GFF				32.053	149	516	819	377	C17H24O4	3395.5	292	Phthalate
Phth	3	2293.5	1.76	GFF				97330	149	922	925	5443	C16H22O4	31642660	278	Phthalate
Phth	3	2374.5	1.84	PUF				80.689	59	868	891	2390	C22H34O4	62805	362	Phthalate
Phth	3	2379	1.81	GFF				72.548	219	896	914	904	C17H24O4	12437	292	Phthalate
Phth	3	2397	0.12	GFF				44.396	149	366	803	645	C20H30O4	8899.8	334	Phthalate
Phth	3	2397	0.21	GFF				51.828	149	828	849	628	C25H31NO6	9668.2	441	Phthalate
Phth	3	2397	3.79	GFF				76.022	149	429	761	524	C17H20O4	25381	288	Phthalate
Phth	3	2397	4.13	GFF				56.578	149	384	731	679	C19H19BrO4	7447.8	390	Phthalate
Phth	3	2401.5	4.05	GFF				44.103	149	459	853	607	C22H25BrO4	10977	432	Phthalate
Phth	3	2410.5	0.35	GFF				44.493	149	782	874	2147	C25H31NO6	12375	441	Phthalate
Phth	3	2410.5	0.83	GFF				36.911	149	392	741	565	C19H25ClO4	12483	352	Phthalate
Phth	3	2455.5	1.78	GFF				3734.7	163	902	912	2021	C17H24O4	697892	292	Phthalate
Phth	3	2496	1.95	GFF				5397.6	163	858	865	8192	C17H24O4	1084926	292	Phthalate
Phth	3	2523	1.85	GFF				67505	149	884	905	1765	C19H28O4	33188149	320	Phthalate
Phth	3	2523	2.13	GFF				26.293	241	498	708	802	C18H23ClO4	965.81	338	Phthalate
Phth	3	2617.5	1.82	GFF				6153.2	149	905	921	2168	C19H28O4	2131298	320	Phthalate
Phth	3	2649	1.86	GFF				907.05	149	687	828	448	C20H30O4	259914	334	Phthalate
Phth	3	2685	1.72	GFF				225.56	149	644	771	994	C17H20O4	99329	288	Phthalate
Phth	3	2721	1.85	PUF				871.03	149	667	874	423	C22H34O4	702712	362	Phthalat
Phth	3	2721	1.85	GFF				5727.1	149	858	867	485	C20H30O4	1601061	334	Phthalate
Phth	3	2743.5	1.85	PUF				547.61	149	636	870	684	C20H30O4	190801	334	Phthalate
Phth	3	2757	1.85	PUF				1054.5	149	813	900	1157	C20H30O4	345025	334	Phthalat
Phth	3	2950.5	1.9	PUF				77.849	265	555	657	1523	C20H34O	12380	290	Phthalate
Phth	3	3018	1.96	PUF				81.56	210	695	706	5553	C22H34O4	18737	362	Phthalate
Phth	3	3018	2.07	GFF				57.3	175	843	860	1269	C22H34O4	11724	362	Phthalate
Phth	3	3036	3.65	GFF				26.787	649	301	615	1453	C19H27ClO4	548.36	354	Phthalate
Phth	3	3216	2.02	GFF				270.22	293	824	839	1618	C25H40O4	48351	404	Phthalate
Phth	3	3243	1.86	GFF				705.91	149	734	808	554	C26H42O4	137451	418	Phthalate
Phth	3	3247.5	2.02	GFF				498.76	167	815	844	829	C25H40O4	356451	404	Phthalate
Phth	3	3252	1.9	PUF				229.03	252	562	687	485	C20H23NO3	19222	325	Phthalate
Phth	3	3283.5	2.01	GFF				2501	149	855	874	1441	C23H36O4	2161050	376	Phthalate
Phth	3	3288	2.03	PUF				42.85	217	678	731	773	C23H36O4	7110.2	376	Phthalate
Phth	3	3301.5	2.02	GFF				1189.7	149	816	845	906	C23H36O4	1265860	376	Phthalate
Phth	3	3315	2.03	GFF				2587.2	149	842	866	947	C23H36O4	1760355	376	Phthalate
Phth	3	3346.5	2.07	GFF				2614.8	149	870	887	1085	C23H36O4	1588026	376	Phthalate
Phth	3	3351	1.48	PUF				28.561	149	321	646	1142	C17H22O4	8757.1	290	Phthalate
Phth	3	3364.5	2.09	GFF				1376.6	149	821	842	667	C24H38O4	633724	390	Phthalate
Phth	3	3531	2.42	GFF				528.52	149	824	851	381	C27H44O4	981027	432	Phthalate
Phth	3	3544.5	2.5	GFF				30.894	149	799	907	939	C20H30O4	11645	334	Phthalate
Phth	3	3630	2.75	GFF				29.177	149	341	695	831	C28H46O5	8558.5	462	Phthalate
Level 4 compounds
	4	786	1.49	PUF				166.9	91	870	885	9331	C8H8O	270416	120	pos mol formula
	4	795	1.25	PUF				80.071	109	697	812	1647	C8H12O	223158	124	pos mol formula
	4	804	1.61	PUF				34.799	110	722	799	2014	C9H10	17518	118	pos mol formula
	4	1038	1.63	PUF				640.51	119	878	907	4069	C9H10O	349602	134	pos mol formula
	4	1173	0.4	PUF				15.15	547	304	404	6727	C7H4Cl4O2	293.06	262	pos mol formula
	4	1213.5	1.2	PUF				849.3	119	858	879	3407	C10H14	8584648	134	pos mol formula
	4	1366.5	1.95	PUF				288.52	174	815	819	7263	C13H18	33122	174	pos mol formula
	4	1429.5	1.64	PUF				3499.5	146	868	893	6358	C10H10O	637601	146	pos mol formula
	4	1578	1.93	PUF				3938.2	173	801	854	3504	C14H20	709636	188	pos mol formula
	4	1641	1.81	PUF				123.86	140	584	607	2323	C13H16O	29165	188	pos mol formula
UNKNOWN halogenated	4	1672.5	1.81	PUF				1191.8	300	532	551	2160		49122	304	Cluster looks like 6Cl, but might be BrCl3, Me loss, M-15-28 or M-43 first after that could be Cl/Br loss, but difficult to identify
	4	1708.5	1.91	PUF				1582.6	206	841	849	5471	C14H22O	285842	206	possible; checked at suspect screening to be nothing of interrest
Bifenthrin related UNKNOWN	4	1771.5	1.81	PUF				2257.3	166	546	630	7495		810021	422	Bifetrhrin backbone but M(x)~234 (no Bifenthrin M(x)422)
UNKNOWN halogenated	4	1812	1.72	PUF				9380.1	220	628	700	5510		931959	220	2xCl +Me group; not ClBr like NIST, isotope cluster doesnt match for mixed; looks like 2xCl
	4	1816.5	1.66	PUF				940.93	160	827	863	3867	C11H12O	118856	160	pos mol formula
UNKNOWN halogenated	4	1866	1.88	PUF				4185.2	256	541	647	1070		449729	274	3xCl + Me group
UNKNOWN halogenated	4	1888.5	1.85	PUF				14607	256	558	616	1439		1649829	254	Brthiophene or 3xCl UNKNOWN?
UNKNOWN halogenated	4	1902	2.91	PUF				380.47	101	694	790	5085		282195	302	all NIST Hits got plenty F+Cl in Formula??
	4	1906.5	1.6	PUF				4602.6	132	836	865	1963	C9H8O	1013735	132	pos mol formula
	4	1924.5	1.63	PUF				68.802	317	372	471	906	C8H5BrCl3NO	2097.8	315	low S/N but could be
UNKNOWN halogenated	4	1956	1.69	PUF				1192	220	540	596	2475		94337	220	like #5672 2xCl +Me group; not ClBr like NIST, isotope cluster doesnt match for mixed; looks like 2xCl
UNKNOWN halogenated	4	1983	1.79	PUF				4009.7	255	654	703	4801		275174	270	UNKNOWN 3xCl +Me group, Mx~270 Halogencluster looks more 3xCl than 1xBr
	4	1987.5	1.55	PUF				29590	131	859	873	2403	C11H12O	13242754	160	pos mol formula
	4	1992	1.7	PUF				219.53	181	395	480	5896	C15H24	121056	204	pos mol formula
	4	2005.5	1.8	PUF				17391	196	733	829	1551	C14H12O	2639388	196	pos mol formula
UNKNOWN halogenated	4	2010	1.73	PUF				2946.7	258	537	590	1959		164045	259	UNKNOWN 1xBr and Ethyl group Mx~258
UNKNOWN halogenated	4	2010	1.79	PUF				949.94	330	528	674	815		39676	194	coeluting with #7627 which is 4xCl; difficult to check further clusters than M(x) buth should be 3-4xCl +Me gruop/MeO group
UNKNOWN halogenated	4	2055	1.92	PUF				8942.7	255	561	617	1384		951761	284	3xCl possible M(x)~282
	4	2095.5	1.81	PUF				27027	196	837	877	5744	C14H12O	6813148	196	pos mol formula
UNKNOWN halogenated	4	2158.5	1.81	PUF				240.28	324	577	673	1313		9790.4	194	2xBr cluster oder Cl2Br M(x)~322
UNKNOWN halogenated	4	2172	1.96	PUF				408.36	226	540	559	1022		108105	246	7xCl cluster M(x)~342
UNKNOWN halogenated	4	2176.5	1.95	PUF				481.01	226	381	434	1100		55966	226	part of #9024? 7xCl cluster M(x)~342
UNKNOWN halogenated	4	2194.5	1.77	PUF				1251.4	376	535	691	4686		53364	374	NIST doesn´t match, is a 3xBr cluster + Me/Meo groups M(x)~372
UNKNOWN halogenated	4	2203.5	1.81	PUF				350.83	305	346	480	697		12980	318	NIST doesn´t match, is a 5xBr cluster + Me/Meo groups M(x)~318
	4	2230.5	1.66	PUF				12579	214	914	915	9604	C14H14O2	1258501	214	or Benzamide, 2-hydroxy-N-(4-pyridinyl)- CAS 282730-70-5 C12H10N2O2
	4	2266.5	1.78	PUF				1209.9	220	755	782	3913	C17H16	94745	220	pos mol formula
	4	2307	1.72	PUF				2484.4	206	837	852	1992	C16H14	378474	206	pos mol formula
	4	2338.5	1.84	PUF				127.76	372	309	453	748	C12H15NO	4256.5	189	M(x)~370 Me group,not sure about Cl/Br, bad spectra
UNKNOWN halogenated	4	2388	1.94	PUF				1195	89	477	493	5552		1163172	396	M(x)~310, min 3xCl Isomer to #11032
UNKNOWN halogenated	4	2406	1.93	PUF				425.3	238	492	500	4776		113883	396	M(x)~310, min 3xCl Isomer to #10802
UNKNOWN halogenated	4	2415	1.94	PUF				228.62	277	477	485	3029		18845	334	M(x)~310, min 3xCl isomer to #10802
UNKNOWN halogenated	4	2433	1.93	PUF				319.57	277	383	684	1135		23264	277	M(x)~273?!?, could be further isomer to #10802
UNKNOWN halogenated	4	2437.5	1.79	PUF				215.18	390	430	500	1317		7199.3	810	M(x)~386, 6-7xCl, Me group
UNKNOWN halogenated	4	2442	1.79	PUF				76.058	390	396	495	1069		2586	208	part of #11197
UNKNOWN halogenated	4	2541	1.71	PUF				119.19	371	544	601	2349		3608.3	356	M(x)~402 min 3xCl
UNKNOWN halogenated	4	2586	1.95	PUF				156.12	252	330	520	615		22939	252	M(x)~370 or evt cluster at M(x)406 but this could come from trans Nonachlo (#12148), min 1 more isomer #12167? #12255?
UNKNOWN halogenated	4	2590.5	1.92	PUF				150.34	329	542	588	2405		33654	296	M(x)~370 min 1 more isomer #12147 #12255?
UNKNOWN halogenated	4	2604	1.92	PUF				94.302	373	334	362	4388		3242.9	276	M(x)~370, min 1 more isomer #12167 #12147
UNKNOWN halogenated	4	2635.5	1.93	PUF				87.818	252	422	436	3854		15264	386	same as those?!? M(x)~370, min 1 more isomer #12167 #12147 #12215
UNKNOWN halogenated	4	2635.5	1.94	PUF				80.489	275	390	571	484		6234.6	238	same as those?!? M(x)~370, min 1 more isomer #12167 #12147 #12215
UNKNOWN halogenated	4	2824.5	1.76	PUF				309.72	185	665	865	4571		31013	262	Br ethyl benzene+?? M(x)~289 or 183
	4	1618.5	1.77	GFF				323.74	205	611	649	9810	C15H24O	43464	220	pos mol formula
	4	1749	1.56	GFF				48.184	327	623	757	2385	C9H8O2	2945.4	148	or C10H12O
UNKNOWN halogenated	4	2482.5	1.35	GFF				26.891	101	370	690	644		3266.9	213	part of UNKNOWN #9842 which is huge
UNKNOWN halogenated	4	2482.5	1.64	GFF				69758	173	821	901	1658		10975705	204	Huge peak S/N (173) 69758! , backbone from Dichlorobenzamide, but min 2xCl more and other side chain. M(x)~254
UNKNOWN halogenated	4	2491.5	1.76	GFF				599.94	172	537	558	3364		49201	257	almost like 4-[3,4-Dichlorophenyl]-2H-1,3[3H]-oxazine-2,6-dione CAS 58755-80-9 C10H5Cl2NO3; but mass cluster at 240 and 157 is one mass lower; M(x)~323 (named compound is 257)
UNKNOWN halogenated	4	2653.5	1.91	GFF				64.965	77	358	380	4874		76500	396	might be 4xCl or mixed, low S/N
UNKNOWN halogenated	4	2703	1.67	GFF				241.16	209	640	766	4107		20450	242	3xCl Phenyl + side chain M(z)~290
UNKNOWN halogenated	4	2734.5	1.72	GFF				14565	173	819	922	1873		2552612	220	2xCl Phenyl + side chanin M(x)~230
UNKNOWN halogenated	4	2806.5	1.64	GFF				34.994	209	292	572	179		3198.1	252	3xCl Phenyl with side chanin, low S/N not idea about M(x)
UNKNOWN halogenated	4	3162	1.43	GFF				21.897	478	360	437	3431		973.02	478	min 3xCl M(x)~478 isomer #14380
UNKNOWN halogenated	4	3175.5	1.82	GFF				267.31	213	416	517	1096		30306	257	min 2xCl DiClphenyl + side chain M(x)~299
UNKNOWN halogenated	4	3198	1.41	GFF				33.025	478	390	771	4721		1078.5	523	min 3xCl M(x)~478 isomer to #14273
UNKNOWN halogenated	4	3382.5	1.86	GFF				218.15	300	423	597	953		7178.4	365	M(x)~365 no Hal loss visible, good specra
UNKNOWN halogenated	4	3495	2.03	GFF				2119.6	173	824	915	3266		265447	213	7xCl; no PCB; from M(x)213 match with 3,4-Dichlorobenzoylacetonitrile like originila ident fra CT M(x)~393
