# Supplementary material for: Non-target and suspect characterisation of organic contaminants in Arctic air, Part II: Application of a new tool for identification and prioritisation of chemicals of emerging Arctic concern in air
Source: Copernicus journal article supplement (doi:10.5194/acp-2020-105), 2020-02-13
Supplement: Supplementary file 2 [file acp-2020-105-supplement.zip]

Archive with 2 entries (2 files):
- Excel-SI acp-2020-105.xlsx
- Supplementary material acp-2020-105.pdf
